# Supplementary material for: Facile and Simple Post Treatment Ball Milling Strategy for the Production of Low-Cost TiO2 Composites with Enhanced Photocatalytic Performance and Applicability to Construction Materials
Source: MDPI journal article supplement (doi:10.3390/ma16144931), 2023-07-10
Supplement: s1 [file s1]

Supplementary Materials

# Facile and Simple Post Treatment Ball Milling Strategy for the Production of Low-Cost TiO<sub>2</sub> Composites with Enhanced Photocatalytic Performances and Applicability to Construction Materials

Supporting Information- Characterization Details (SI-CD)

| Experiments  | Instruments                                  | Manufacturer                                 |
|--------------|----------------------------------------------|----------------------------------------------|
| XRD          | Multi-purpose X-ray Diffractometer           | Malvern PANalytical                          |
| XPS          | The K-alpha X-ray photoelectron spectrometer | ThermoScientific                             |
| DRS          | diffuse reflector                            | SCINCO CO., Ltd., Korea                      |
| SEM          | SU8220                                       | Hitachi High-Technologies Corporation, Japan |
| PSA          | Mastersizer 3000                             | Malvern PANalytical                          |
| Ball Milling | AV-1 ball miller                             | AS ONE Corporation in Japan                  |

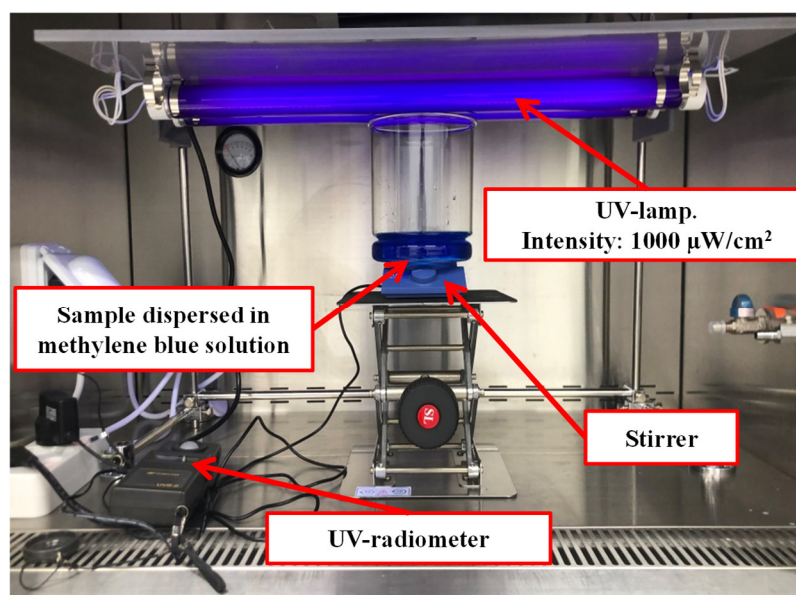

**Figure S1.** Configuration of methylene blue photodegradation experimental setup.

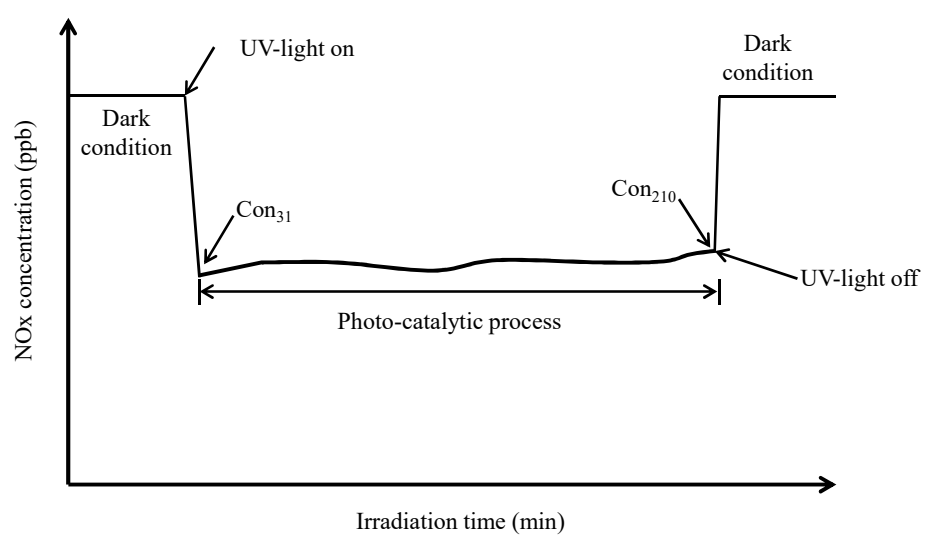

**Figure S2.** Typical photocatalytic NO<sub>x</sub> removal measurement scheme.

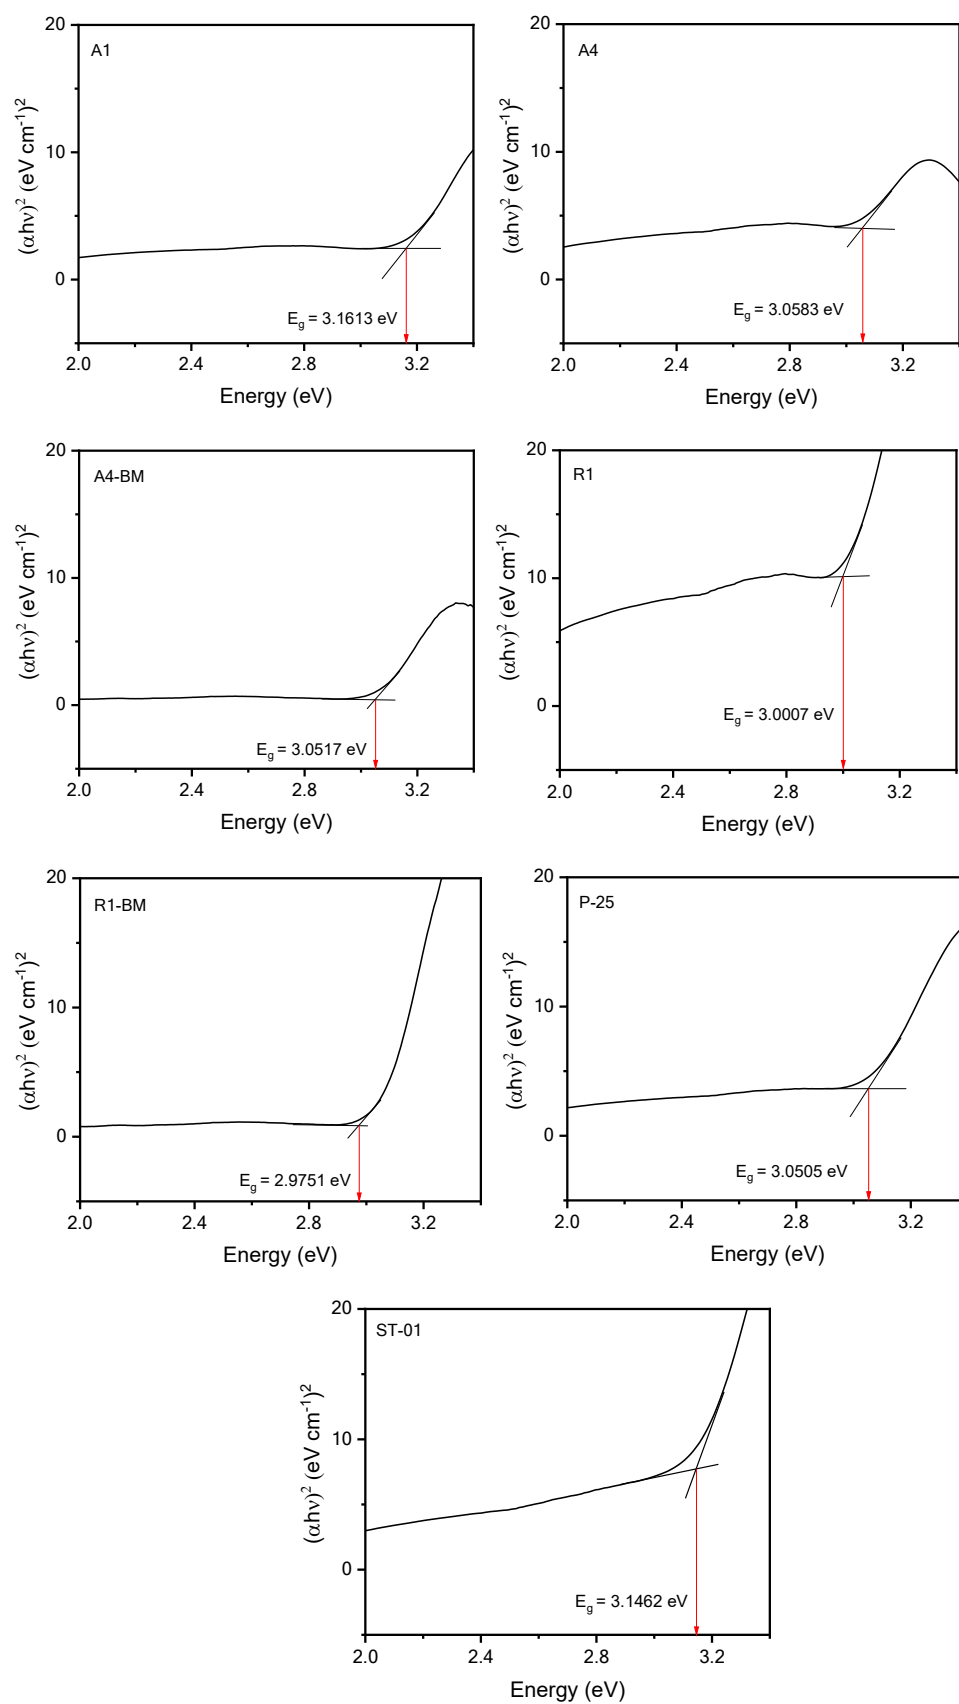

Figure S3. Tauc plots of the photocatalysts used.

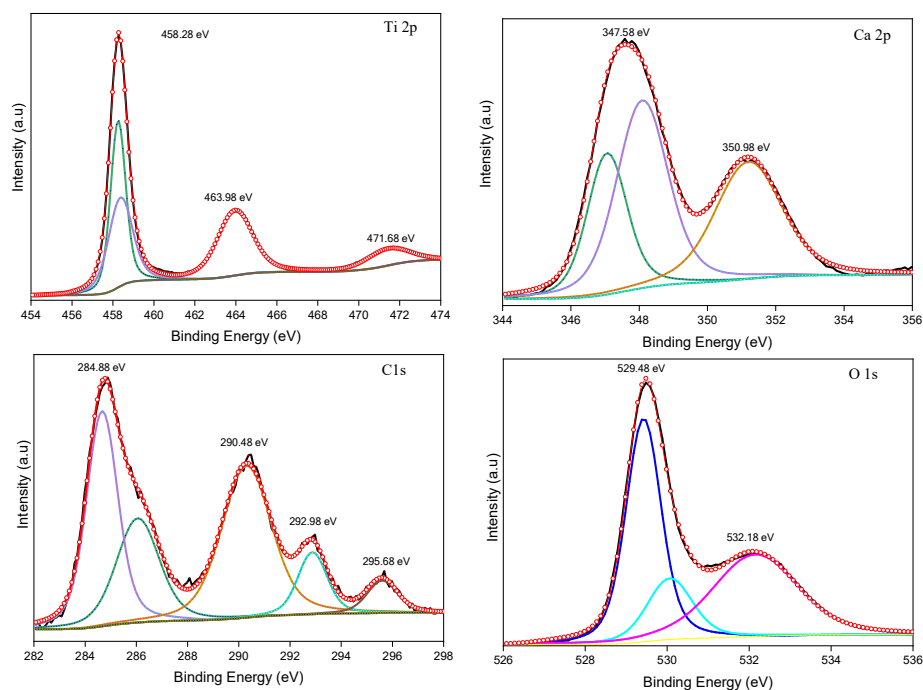

**Figure S4.** The XPS spectra of A1-BM photocatalyst.

**Table S1.** NO<sub>x</sub> photodegradation efficiency of mortar plate coated with the photocatalysts.

| Irradiation time (h) | Photocatalysts                                  |       |     |       |     |       |      |
|----------------------|-------------------------------------------------|-------|-----|-------|-----|-------|------|
|                      | A1                                              | A1-BM | A4  | A4-BM | R1  | R1-BM | P25  |
|                      | NO <sub>x</sub> photodegradation efficiency (%) |       |     |       |     |       |      |
| 2h                   | 42.6                                            | 57.9  | 3.6 | 4     | 6.5 | 7.6   | 85   |
| 3h                   | 43                                              | 58    | 3.9 | 4.5   | 7   | 8     | 85.9 |

**Table S2.** NO<sub>x</sub> photodegradation efficiency of mortar mixed with the photocatalysts.

| Irradiation time (h) | Photocatalysts                                  |           |           |         |          |
|----------------------|-------------------------------------------------|-----------|-----------|---------|----------|
|                      | A1-BM 5%                                        | A1-BM 10% | A1-BM 15% | P25 15% | ST01 15% |
|                      | NO <sub>x</sub> photodegradation efficiency (%) |           |           |         |          |
| 2h                   | 18.8                                            | 25.4      | 27.6      | 60      | 43       |
| 3h                   | 19                                              | 26        | 28        | 60.4    | 44.6     |

**Table S3.** Summary of the band gap energy of TiO<sub>2</sub> photocatalysts.

| TiO <sub>2</sub> photocatalysts | Band bag energy (eV) |
|---------------------------------|----------------------|
| A1                              | 3.1613               |
| A4                              | 3.0583               |
| R1                              | 3.0007               |
| P-25                            | 3.0505               |
| ST-01                           | 3.1462               |
| A1-BM                           | 3.1563               |
| A4-BM                           | 3.0517               |
| R1-BM                           | 2.9751               |

**Table S4.** Summary of particle size of the photocatalysts obtained from SEM images.

| A1                         | A1-BM | A4    | A4-BM | R1    | R1-BM | P25  | ST01 |
|----------------------------|-------|-------|-------|-------|-------|------|------|
| Particle size (nm)         |       |       |       |       |       |      |      |
| 196.7                      | 36.3  | 88.5  | 59    | 95.1  | 37.7  | 13.1 | 80.3 |
| 98.1                       | 180.3 | 55.7  | 32.7  | 336.1 | 26.2  | 9.8  | 60.6 |
| 133.5                      | 131.1 | 245.9 | 236   | 295   | 322.9 | 32.7 | 6.5  |
| 90.1                       | 16.4  | 44.2  | 31.1  | 32.7  | 186.8 | 27.8 | 45.8 |
| 136                        | 18    | 54.1  | 96.7  | 73.7  | 195   | 86.8 | 24.5 |
| Particle size average (nm) |       |       |       |       |       |      |      |
| 130.9                      | 76.4  | 97.7  | 91.1  | 166.5 | 153.7 | 34   | 43.5 |

**Table S5.** Summary of atomic percent.

| Name       | Photocatalysts |       |       |       |       |       |       |       |
|------------|----------------|-------|-------|-------|-------|-------|-------|-------|
|            | A1             | A1-BM | A4    | A4-BM | R1    | R1-BM | P25   | ST01  |
|            | Atomic (%)     |       |       |       |       |       |       |       |
| C1s Scan A | 6.47           | 5.49  | -     | -     | -     | -     | -     | -     |
| C1s Scan B | 11.98          | 6.22  | -     | -     | -     | -     | -     | -     |
| C1s Scan C | 2.1            | 4.02  | -     | -     | -     | -     | -     | -     |
| Ca2p       | 12.05          | 6.56  | 15.81 | 14.76 | 11.44 | 10.87 | -     | -     |
| Ti2p       | 8.75           | 18.02 | 0.38  | 0.64  | 2.2   | 2.81  | 28.7  | 27.36 |
| O1s        | 54.11          | 54.99 | 56.13 | 56.25 | 58.1  | 58.31 | 55.19 | 54.96 |
| C1s        | -              | -     | 25.55 | 25.12 | 22.15 | 20.5  | 12.19 | 12.45 |

**Table S6.** Summary of particle size analysis results deduced from dynamic light scattering.

| Samples | Conc <sup>1</sup><br>(%) | Span   | U <sup>2</sup> | S.S.A <sup>3</sup><br>(m <sup>2</sup> /kg) | D[3,2]<br>(μm) | D[4,3]<br>(μm) | D(10)<br>(μm) | D(50)<br>(μm) | D(90)<br>(μm) |
|---------|--------------------------|--------|----------------|--------------------------------------------|----------------|----------------|---------------|---------------|---------------|
| A1      | 0.0008                   | 3.614  | 1.154          | 3016                                       | 1.99           | 11.9           | 0.718         | 7.44          | 27.6          |
| A1-BM   | 0.0006                   | 21.638 | 8.323          | 3279                                       | 1.83           | 101            | 0.528         | 11.6          | 25.3          |
| A4      | 0.0005                   | 2.536  | 0.801          | 4146                                       | 1.45           | 5.76           | 0.477         | 4.61          | 12.2          |
| A4-BM   | 0.0004                   | 2.609  | 0.877          | 6036                                       | 0.994          | 3.20           | 0.347         | 2.43          | 6.70          |
| R1      | 0.0003                   | 3.106  | 1.004          | 6943                                       | 0.864          | 4.33           | 0.274         | 3.24          | 10.3          |
| R1-BM   | 0.0005                   | 3.343  | 1.130          | 8890                                       | 0.675          | 2.40           | 0.245         | 1.60          | 5.59          |
| KA-100  | 0.0003                   | 4.068  | 1.626          | 7081                                       | 0.847          | 10.6           | 0.261         | 5.73          | 23.6          |
| P-25    | 0.0003                   | 3.067  | 1.073          | 2393                                       | 2.51           | 5.94           | 1.11          | 3.71          | 12.5          |
| ST-01   | 0.0008                   | 2.810  | 0.905          | 3552                                       | 1.69           | 6.84           | 0.621         | 5.09          | 14.9          |

<sup>1</sup> Concentration. <sup>2</sup> Uniformity. <sup>3</sup> Specific surface area.
